# Supplementary material for: Reaction mechanism of dimethyl carbonate synthesis on Cu/β zeolites: DFT and AIM investigations
Source: Royal Society of Chemistry journal article supplement (doi:10.1039/c2ra20480k), 2012-01-01
Supplement: c2ra20480k.pdf [file c2ra20480k.pdf]

## Supporting Information for

### Reaction Mechanism of Dimethyl Carbonate Synthesis on Cu- $\beta$

### Zeolites: DFT and AIM Investigations

Yongli Shen, Qingsen Meng, Shouying Huang, Shengping Wang, Jinlong Gong, and Xinbin Ma\*

*Key Laboratory for Green Chemical Technology of Ministry of Education, School of Chemical  
Engineering and Technology, Tianjin University, Tianjin 300072, China*

\*E-mail: [xbma@tju.edu.cn](mailto:xbma@tju.edu.cn)

Table S1. Local topological properties (in au.) of the electronic charge density distribution calculated at the position of the bond critical points of selected bond paths for energy minima and transition state of the MMC formation reaction from B3PW91/6-31++G\*\* calculations.

|                                    | $\rho_b$ | $\nabla^2\rho_b$ | $\epsilon$ | $H_b$   | $G_b$  | $V_b$   | $ V_b /G_b$ | $ \lambda_1 / \lambda_3 $ |
|------------------------------------|----------|------------------|------------|---------|--------|---------|-------------|---------------------------|
| CH <sub>3</sub> O-OH-CO            |          |                  |            |         |        |         |             |                           |
| Cu-O1                              | 0.0673   | 0.3360           | 0.0433     | -0.0052 | 0.0892 | -0.0945 | 1.0594      | 0.1594                    |
| Cu-O2                              | 0.0536   | 0.2961           | 0.0224     | -0.0053 | 0.0649 | -0.0703 | 1.0832      | 0.1641                    |
| Cu-O3                              | 0.1184   | 0.5050           | 0.0547     | -0.0206 | 0.1469 | -0.1675 | 1.1402      | 0.2203                    |
| Cu-O4                              | 0.1151   | 0.6943           | 0.0692     | -0.0183 | 0.1436 | -0.1619 | 1.1274      | 0.2209                    |
| Cu-C1                              | 0.0184   | 0.0546           | 0.0243     | -0.0006 | 0.0142 | -0.0148 | 1.0423      | 0.1800                    |
| C1-O5                              | 0.4732   | 0.5600           | 0.0023     | -0.8283 | 0.9683 | -1.7965 | 1.8553      | 0.4228                    |
| C1-O3                              | n.a.     | n.a.             | n.a.       | n.a.    | n.a.   | n.a.    | n.a.        | n.a.                      |
| C1-O4                              | n.a.     | n.a.             | n.a.       | n.a.    | n.a.   | n.a.    | n.a.        | n.a.                      |
| O3-H1                              | 0.3488   | -0.6735          | 0.0253     | -0.6573 | 0.0705 | -0.7278 | 10.3234     | 1.7456                    |
| TS                                 |          |                  |            |         |        |         |             |                           |
| Cu-O1                              | 0.0637   | 0.3028           | 0.0372     | -0.0062 | 0.0819 | -0.0882 | 1.0769      | 0.1674                    |
| Cu-O2                              | 0.0211   | 0.0696           | 0.2918     | -0.0017 | 0.0192 | -0.0210 | 1.0938      | 0.1863                    |
| Cu-O3                              | 0.0540   | 0.2610           | 0.9483     | -0.0056 | 0.0708 | -0.0764 | 1.0791      | 0.1678                    |
| Cu-O4                              | 0.0833   | 0.3877           | 0.0211     | -0.0082 | 0.1052 | -0.1134 | 1.0779      | 0.1866                    |
| Cu-C1                              | 0.1084   | 0.2416           | 0.0307     | -0.0350 | 0.0954 | -0.1303 | 1.3658      | 0.2791                    |
| C1-O5                              | 0.4512   | 0.4400           | 0.0302     | -0.7862 | 0.8962 | -1.6824 | 1.8773      | 0.4314                    |
| C1-O3                              | 0.1085   | 0.1338           | 0.1510     | -0.0302 | 0.0636 | -0.0938 | 1.4748      | 0.3778                    |
| C1-O4                              | n.a.     | n.a.             | n.a.       | n.a.    | n.a.   | n.a.    | n.a.        | n.a.                      |
| O3-H1                              | 0.3337   | -2.1733          | 0.0205     | -0.6100 | 0.0667 | -0.6768 | 10.1469     | 1.7130                    |
| CH <sub>3</sub> OCO <sub>2</sub> H |          |                  |            |         |        |         |             |                           |
| Cu-O1                              | 0.0929   | 0.5582           | 0.0117     | -0.0099 | 0.1494 | -0.1593 | 1.0663      | 0.1609                    |
| Cu-O2                              | 0.0261   | 0.0900           | 0.1712     | -0.0029 | 0.0254 | -0.0283 | 1.1142      | 0.1742                    |
| Cu-O3                              | n.a.     | n.a.             | n.a.       | n.a.    | n.a.   | n.a.    | n.a.        | n.a.                      |
| Cu-O4                              | 0.0758   | 0.4803           | 0.0467     | -0.0042 | 0.1243 | -0.1286 | 1.0346      | 0.1525                    |
| Cu-C1                              | n.a.     | n.a.             | n.a.       | n.a.    | n.a.   | n.a.    | n.a.        | n.a.                      |
| C1-O5                              | 0.4231   | -0.2506          | 0.1299     | -0.7291 | 0.6665 | -1.3956 | 2.0939      | 0.6033                    |
| C1-O3                              | 0.3137   | -0.6192          | 0.0856     | -0.4622 | 0.3074 | -0.7696 | 2.5036      | 0.9345                    |
| C1-O4                              | 0.2829   | -0.5844          | 0.0686     | -0.3880 | 0.2419 | -0.6298 | 2.6036      | 1.0209                    |
| O3-H1                              | 0.3488   | -2.4756          | 0.0175     | -0.6792 | 0.0602 | -0.7395 | 12.2841     | 1.7378                    |

Table S2. Local topological properties (in au.) of the electronic charge density distribution calculated at the position of the bond critical points of selected bond paths for energy minima and transition state of the DMC formation reaction from B3PW91/6-31++G\*\* calculations.

|                        | $\rho_b$ | $\nabla^2\rho_b$ | $\epsilon$ | $H_b$   | $G_b$  | $V_b$   | $ V_b /G_b$ | $ \lambda_1 /\lambda_3$ |
|------------------------|----------|------------------|------------|---------|--------|---------|-------------|-------------------------|
| MMC-CH <sub>3</sub> OH |          |                  |            |         |        |         |             |                         |
| Cu-O1                  | 0.0797   | 0.4569           | 0.0099     | -0.0078 | 0.1220 | -0.1298 | 1.0639      | 0.1585                  |
| Cu-O2                  | 0.0225   | 0.0773           | 0.1930     | -0.0019 | 0.0212 | -0.0231 | 1.0896      | 0.1706                  |
| Cu-O4                  | 0.0649   | 0.3772           | 0.0392     | -0.0047 | 0.0990 | -0.1036 | 1.0465      | 0.1560                  |
| Cu-O6                  | 0.0348   | 0.1197           | 0.0234     | -0.0058 | 0.0357 | -0.0415 | 1.1625      | 0.1843                  |
| C1-O5                  | 0.4208   | -0.2669          | 0.1262     | -0.7232 | 0.6564 | -1.3795 | 2.1016      | 0.6083                  |
| C1-O3                  | 0.3101   | -0.6227          | 0.0804     | -0.4537 | 0.2980 | -0.7518 | 2.5228      | 0.9509                  |
| C1-O4                  | 0.2905   | -0.5939          | 0.0714     | -0.4061 | 0.2576 | -0.6638 | 2.5769      | 0.9971                  |
| C1-O6                  | n.a.     | n.a.             | n.a.       | n.a.    | n.a.   | n.a.    | n.a.        | n.a.                    |
| O3-H1                  | 0.3505   | -2.4763          | 0.0183     | -0.6806 | 0.0615 | -0.7422 | 12.0683     | 1.7430                  |
| O3-H2                  | n/a      | n/a              | n/a        | n/a     | n/a    | n/a     | n/a         | n/a                     |
| O6-H2                  | 0.3434   | -2.3683          | 0.0226     | -0.6592 | 0.0671 | -0.7263 | 10.8241     | 1.7344                  |
| TS                     |          |                  |            |         |        |         |             |                         |
| Cu-O1                  | 0.0959   | 0.5799           | 0.0155     | -0.0106 | 0.1556 | -0.1663 | 1.0688      | 0.1623                  |
| Cu-O2                  | 0.0198   | 0.0676           | 0.3761     | -0.0009 | 0.0178 | -0.0187 | 1.0506      | 0.1723                  |
| Cu-O4                  | 0.0780   | 0.4901           | 0.0603     | -0.0048 | 0.1274 | -0.1322 | 1.0377      | 0.1560                  |
| Cu-O6                  | n.a.     | n.a.             | n.a.       | n.a.    | n.a.   | n.a.    | n.a.        | n.a.                    |
| C1-O5                  | 0.4251   | -0.1981          | 0.1169     | -0.7338 | 0.6843 | -1.4181 | 2.0723      | 0.5824                  |
| C1-O3                  | 0.0254   | 0.0907           | 0.3718     | 0.0009  | 0.0217 | -0.0207 | 0.9539      | 0.1719                  |
| C1-O4                  | 0.2827   | -0.6052          | 0.0597     | -0.3852 | 0.2339 | -0.6190 | 2.6464      | 1.0511                  |
| C1-O6                  | 0.3024   | -0.6791          | 0.0753     | -0.4296 | 0.2598 | -0.6895 | 2.6540      | 1.0690                  |
| O3-H1                  | 0.3527   | -2.3817          | 0.0240     | -0.6647 | 0.0692 | -0.7339 | 10.6055     | 1.6737                  |
| O3-H2                  | 0.3652   | -2.5222          | 0.0237     | -0.7032 | 0.0727 | -0.7760 | 10.6740     | 1.7537                  |
| O6-H2                  | n/a      | n/a              | n/a        | n/a     | n/a    | n/a     | n.a.        | n.a.                    |
| DMC-H <sub>2</sub> O   |          |                  |            |         |        |         |             |                         |
| Cu-O1                  | 0.0961   | 0.5776           | 0.0168     | -0.0108 | 0.1552 | -0.1660 | 1.0696      | 0.1630                  |
| Cu-O2                  | 0.0216   | 0.0749           | 0.2857     | -0.0013 | 0.0200 | -0.0213 | 1.0800      | 0.1709                  |
| Cu-O4                  | 0.0821   | 0.5259           | 0.0544     | -0.0052 | 0.1366 | -0.1418 | 1.0381      | 0.1556                  |
| Cu-O6                  | n.a.     | n.a.             | n.a.       | n.a.    | n.a.   | n.a.    | n.a.        | n.a.                    |
| C1-O5                  | 0.4220   | -0.2726          | 0.1221     | -0.7248 | 0.6567 | -1.3815 | 2.1037      | 0.6082                  |
| C1-O3                  | n.a.     | n.a.             | n.a.       | n.a.    | n.a.   | n.a.    | n.a.        | n.a.                    |
| C1-O4                  | 0.2755   | -0.5879          | 0.0657     | -0.3661 | 0.2191 | -0.5852 | 2.6709      | 1.0618                  |
| C1-O6                  | 0.3234   | -0.6601          | 0.1067     | -0.4803 | 0.3153 | -0.7956 | 2.5233      | 0.9547                  |
| O3-H1                  | 0.3514   | -2.3753          | 0.0223     | -0.6651 | 0.0713 | -0.7364 | 10.3282     | 1.7464                  |
| O3-H2                  | 0.3494   | -2.3800          | 0.0218     | -0.6647 | 0.0697 | -0.7344 | 10.5366     | 1.7470                  |
| O6-H2                  | n.a.     | n.a.             | n.a.       | n.a.    | n.a.   | n.a.    | n.a.        | n.a.                    |

Table S3. Local topological properties (in au.) of the electronic charge density distribution calculated at the position of the bond critical points of selected bond paths for energy minima and transition state of the dimethoxide formation reaction from B3PW91/6-31++G\*\* calculations.

|                                                      | $\rho_b$ | $\nabla^2\rho_b$ | $\varepsilon$ | $H_b$   | $G_b$  | $V_b$   | $ V_b /G_b$ | $ \lambda_1 /\lambda_3$ |
|------------------------------------------------------|----------|------------------|---------------|---------|--------|---------|-------------|-------------------------|
| CH <sub>3</sub> O-OH-CH <sub>3</sub> OH              |          |                  |               |         |        |         |             |                         |
| Cu-O1                                                | 0.0750   | 0.3008           | 0.0633        | -0.0231 | 0.0983 | -0.1215 | 1.2360      | 0.1851                  |
| Cu-O2                                                | 0.0656   | 0.2519           | 0.0324        | -0.0195 | 0.0825 | -0.1019 | 1.2352      | 0.1870                  |
| Cu-O3                                                | 0.1314   | 0.4550           | 0.0500        | -0.0520 | 0.1657 | -0.2177 | 1.3138      | 0.2444                  |
| Cu-O4                                                | 0.1304   | 0.4614           | 0.0609        | -0.0506 | 0.1660 | -0.2166 | 1.3048      | 0.2446                  |
| Cu-O5                                                | 0.0221   | 0.0849           | 0.0260        | 0.0003  | 0.0209 | -0.0206 | 0.9856      | 0.1617                  |
| O3-H1                                                | 0.3487   | -1.9587          | 0.0242        | -0.5631 | 0.0734 | -0.6365 | 8.6717      | 1.1738                  |
| O3-H2                                                | n.a.     | n.a.             | n.a.          | n.a.    | n.a.   | n.a.    | n.a.        | n.a.                    |
| O5-H2                                                | 0.3599   | -2.0278          | 0.0260        | -0.5826 | 0.0756 | -0.6582 | 8.7063      | 1.1836                  |
| TS                                                   |          |                  |               |         |        |         |             |                         |
| Cu-O1                                                | 0.0794   | 0.3336           | 0.0287        | -0.0237 | 0.1071 | -0.1307 | 1.2204      | 0.1763                  |
| Cu-O2                                                | 0.0391   | 0.1449           | 0.0891        | -0.0056 | 0.0418 | -0.0473 | 1.1316      | 0.1855                  |
| Cu-O3                                                | 0.0768   | 0.2389           | 0.0450        | -0.0265 | 0.0863 | -0.1129 | 1.3082      | 0.2405                  |
| Cu-O4                                                | 0.1358   | 0.4961           | 0.0448        | -0.0521 | 0.1761 | -0.2282 | 1.2959      | 0.2294                  |
| Cu-O5                                                | 0.0603   | 0.2108           | 0.0525        | -0.0159 | 0.0686 | -0.0846 | 1.2332      | 0.2076                  |
| O3-H1                                                | 0.3260   | -1.7440          | 0.0048        | -0.5012 | 0.0652 | -0.5663 | 8.6856      | 1.1650                  |
| O3-H2                                                | 0.1129   | -0.0280          | 0.0455        | -0.0699 | 0.0629 | -0.1327 | 2.1097      | 0.5369                  |
| O5-H2                                                | 0.1718   | -0.5169          | 0.0101        | -0.2006 | 0.0713 | -0.2719 | 3.8135      | 0.9066                  |
| CH <sub>3</sub> O-CH <sub>3</sub> O-H <sub>2</sub> O |          |                  |               |         |        |         |             |                         |
| Cu-O1                                                | 0.0850   | 0.3695           | 0.0488        | -0.0264 | 0.1187 | -0.1451 | 1.2224      | 0.1831                  |
| Cu-O2                                                | 0.0243   | 0.0976           | 0.2315        | 0.0003  | 0.0241 | -0.0238 | 0.9876      | 0.1666                  |
| Cu-O3                                                | 0.0245   | 0.0966           | 0.0272        | 0.0001  | 0.0241 | -0.0240 | 0.9959      | 0.1675                  |
| Cu-O4                                                | 0.1432   | 0.5970           | 0.0423        | -0.0541 | 0.2034 | -0.2575 | 1.2660      | 0.2244                  |
| Cu-O5                                                | 0.1198   | 0.3920           | 0.0309        | -0.0477 | 0.1457 | -0.1935 | 1.3281      | 0.2455                  |
| O3-H1                                                | 0.3550   | -2.0379          | 0.0234        | -0.5816 | 0.0721 | -0.6537 | 9.0666      | 1.1790                  |
| O3-H2                                                | 0.3529   | -2.0422          | 0.0234        | -0.5810 | 0.0704 | -0.6514 | 9.2528      | 1.1811                  |
| O5-H2                                                | n.a.     | n.a.             | n.a.          | n.a.    | n.a.   | n.a.    | n.a.        | n.a.                    |

Table S4. Local topological properties (in au.) of the electronic charge density distribution calculated at the position of the bond critical points of selected bond paths for energy minima and transition state of the CO insertion reaction from B3PW91/6-31++G\*\* calculations.

|                                        | $\rho_b$ | $\nabla^2\rho_b$ | $\epsilon$ | $H_b$   | $G_b$  | $V_b$   | $ V_b /G_b$ | $ \lambda_1 /\lambda_3$ |
|----------------------------------------|----------|------------------|------------|---------|--------|---------|-------------|-------------------------|
| CH <sub>3</sub> O-CH <sub>3</sub> O-CO |          |                  |            |         |        |         |             |                         |
| Cu-O1                                  | 0.0590   | 0.2759           | 0.0227     | -0.0056 | 0.0745 | -0.0801 | 1.0752      | 0.1607                  |
| Cu-O2                                  | 0.0608   | 0.2920           | 0.0448     | -0.0051 | 0.0781 | -0.0833 | 1.0666      | 0.1599                  |
| Cu-O3                                  | 0.1141   | 0.4898           | 0.0656     | -0.0183 | 0.1408 | -0.1591 | 1.1300      | 0.2205                  |
| Cu-O4                                  | 0.1143   | 0.4888           | -0.0430    | -0.0185 | 0.1407 | -0.1592 | 1.1315      | 0.2178                  |
| Cu-C1                                  | 0.0232   | 0.0641           | 0.3786     | -0.0022 | 0.0182 | -0.0204 | 1.1209      | 0.1978                  |
| C1-O5                                  | 0.4719   | 0.5799           | 0.0020     | -0.8241 | 0.9691 | -1.7932 | 1.8504      | 0.4203                  |
| C1-O3                                  | n.a.     | n.a.             | n.a.       | n.a.    | n.a.   | n.a.    | n.a.        | n.a.                    |
| C1-O4                                  | n.a.     | n.a.             | n.a.       | n.a.    | n.a.   | n.a.    | n.a.        | n.a.                    |
| TS                                     |          |                  |            |         |        |         |             |                         |
| Cu-O1                                  | 0.0622   | 0.2988           | 0.0349     | -0.0053 | 0.0800 | -0.0853 | 1.0663      | 0.1628                  |
| Cu-O2                                  | 0.0321   | 0.1077           | 0.0986     | -0.0048 | 0.0317 | -0.0365 | 1.1515      | 0.1860                  |
| Cu-O3                                  | 0.0421   | 0.1800           | 1.8199     | -0.0049 | 0.0499 | -0.0548 | 1.0982      | 0.1780                  |
| Cu-O4                                  | 0.1108   | 0.5106           | 0.0463     | -0.0166 | 0.1444 | -0.1610 | 1.1150      | 0.2064                  |
| Cu-C1                                  | 0.0933   | 0.2176           | 0.0177     | -0.0275 | 0.0819 | -0.1093 | 1.3346      | 0.2639                  |
| C1-O5                                  | 0.4555   | 0.4870           | 0.0165     | -0.7931 | 0.9148 | -1.7079 | 1.8670      | 0.4252                  |
| C1-O3                                  | 0.0868   | 0.1531           | 0.1345     | -0.0150 | 0.0532 | -0.0682 | 1.2820      | 0.3234                  |
| C1-O4                                  | n.a.     | n.a.             | n.a.       | n.a.    | n.a.   | n.a.    | n.a.        | n.a.                    |
| DMC                                    |          |                  |            |         |        |         |             |                         |
| Cu-O1                                  | 0.0946   | 0.5703           | 0.0135     | -0.0103 | 0.1528 | -0.1632 | 1.0681      | 0.1617                  |
| Cu-O2                                  | 0.0232   | 0.0792           | 0.2372     | -0.0020 | 0.0218 | -0.0237 | 1.0872      | 0.1733                  |
| Cu-O3                                  | n.a.     | n.a.             | n.a.       | n.a.    | n.a.   | n.a.    | n.a.        | n.a.                    |
| Cu-O4                                  | 0.0784   | 0.4994           | 0.0485     | -0.0046 | 0.1294 | -0.1340 | 1.0355      | 0.1535                  |
| Cu-C1                                  | n.a.     | n.a.             | n.a.       | n.a.    | n.a.   | n.a.    | n.a.        | n.a.                    |
| C1-O5                                  | 0.4211   | -0.2430          | 0.1257     | -0.7235 | 0.6628 | -1.3863 | 2.0916      | 0.6004                  |
| C1-O3                                  | 0.3191   | -0.6110          | 0.1033     | -0.4735 | 0.3207 | -0.7942 | 2.4764      | 0.9190                  |
| C1-O4                                  | 0.2788   | -0.5779          | 0.0688     | -0.3777 | 0.2333 | -0.6110 | 2.6189      | 1.0369                  |
